# Supplementary material
Source: publisher figshare collection journal article supplement (https://frontiersin.figshare.com/ndownloader/files/17503340)
Supplement: Supplementary file [file 17503340]

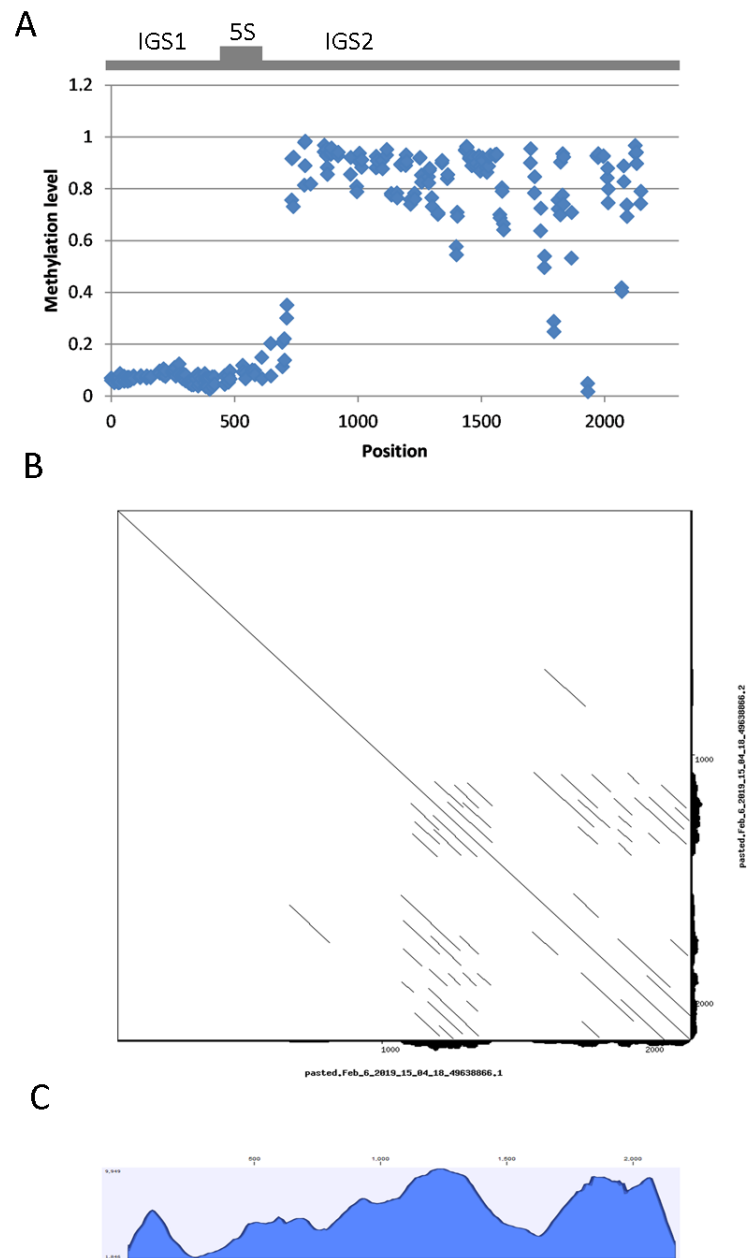

Figure S3. An illustration of potential problems associated with mapping of bisulfite reads to repetitive subregions of IGS. (A) Methylation plot versus IGS1-5S-IGS2 subregions of the *P. formosum* rDNA unit. (B) Dot plot self to self comparison of the IGS1-5S-IGS2 sequence. Note, highly repetitive region immediately downstream of the 5S rRNA gene. (C) Read coverage graph along the IGS1-5S-IGS2 subregion.
